# Supplementary material
Source: Springer Nature journal article supplement (https://www.springermedizin.de/resource/supplementary/12933_2012_521_MOESM6_ESM.pdf/9538718)

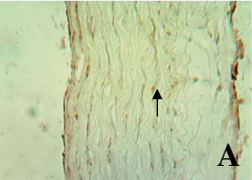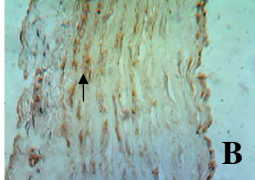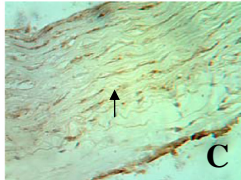

The integrated optical density of MCP-1

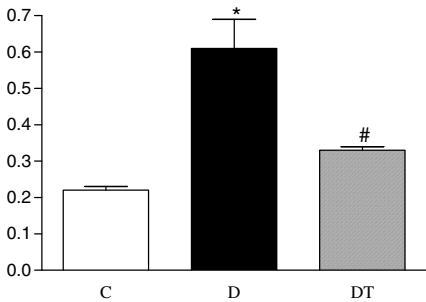

Supplement: MOESM6 [file 9538718]
